# Supplementary material
Source: Elsevier journal article supplement (https://lshtm-eprints-repo-prod.lshtm-eprints.cdl.cosector.com/151/1/mmc3.pdf)
Supplement: mmc3 [file mmc3.pdf]

**Table S3. Age and lean mass index (LMI) adjusted odds ratios (95% confidence intervals (CI)) by sex for the associations between decreased GFR (eGFR <60 ml/min/1.73m<sup>2</sup> derived from IDMS calibrated CKD-EPI formula) and body-mass index (BMI), and components of the metabolic syndrome amongst sample with impedance measurements (each row refers to a separate model on the same set of participants)**

| Factor                                     | Men (N=3627)        |         | Women (N=1211)      |         |
|--------------------------------------------|---------------------|---------|---------------------|---------|
|                                            | Odds ratio (95%CI)  | p-value | Odds ratio (95%CI)  | p-value |
| Occupational grade (per grade increase)    | 0.99 (0.77 to 1.29) | 0.9     | 1.51 (1.03 to 2.23) | 0.04    |
| BMI** (weight(kg)/height(m <sup>2</sup> )) |                     |         |                     |         |
| Overweight                                 | 1.62(1.16 to 2.27)  | 0.005   | 2.07(1.04 to 4.09)  | 0.04    |
| Obese                                      | 1.38(0.83 to 2.30)  | 0.2     | 2.41(1.05 to 5.54)  | 0.04    |
| Waist circumference* (cm)                  |                     |         |                     |         |
| Q2                                         | 1.63(1.05 to 2.53)  | 0.02    | 1.21(0.56 to 2.62)  | 0.6     |
| Q3                                         | 1.79(1.16 to 2.76)  | 0.008   | 0.92(0.40 to 2.10)  | 0.8     |
| Q4                                         | 1.57(0.98 to 2.50)  | 0.06    | 1.17(0.49 to 2.80)  | 0.7     |
| Systolic BP* (mmHg)                        |                     |         |                     |         |
| Q2                                         | 0.61(0.40 to 0.92)  | 0.01    | 0.51(0.24 to 1.09)  | 0.08    |
| Q3                                         | 0.60(0.40 to 0.91)  | 0.01    | 0.69(0.35 to 1.38)  | 0.3     |
| Q4                                         | 0.99(0.68 to 1.43)  | 0.9     | 0.36(0.15 to 0.84)  | 0.02    |
| Diastolic BP* (mmHg)                       |                     |         |                     |         |
| Q2                                         | 0.71(0.47 to 1.06)  | 0.1     | 0.59(0.29 to 1.19)  | 0.1     |
| Q3                                         | 0.88(0.60 to 1.30)  | 0.5     | 0.36(0.15 to 0.86)  | 0.02    |
| Q4                                         | 1.23(0.84 to 1.81)  | 0.3     | 0.80(0.40 to 1.58)  | 0.5     |
| HDL cholesterol* (mg/dL)                   |                     |         |                     |         |
| Q2                                         | 0.60(0.42 to 0.87)  | 0.007   | 0.68(0.34 to 1.36)  | 0.3     |
| Q3                                         | 0.55(0.35 to 0.86)  | 0.009   | 0.60(0.30 to 1.23)  | 0.2     |
| Q4                                         | 0.45(0.30 to 0.67)  | <0.001  | 0.55(0.24 to 1.25)  | 0.2     |
| Triglycerides* (mg/dL)                     |                     |         |                     |         |
| Q2                                         | 1.57(1.03 to 2.39)  | 0.03    | 0.82(0.32 to 2.08)  | 0.7     |
| Q3                                         | 2.07(1.39 to 3.08)  | <0.001  | 2.08(1.03 to 4.20)  | 0.04    |
| Q4                                         | 2.57(1.67 to 3.96)  | <0.001  | 1.84(0.89 to 3.79)  | 0.09    |
| Fasting glucose* (mg/dL)                   |                     |         |                     |         |
| Q2                                         | 1.10(0.73 to 1.65)  | 0.6     | 0.72(0.36 to 1.43)  | 0.3     |
| Q3                                         | 0.99(0.65 to 1.49)  | 0.9     | 0.67(0.31 to 1.42)  | 0.3     |
| Q4                                         | 1.17(0.79 to 1.73)  | 0.4     | 0.70(0.33 to 1.47)  | 0.4     |
| Diabetes prevalence (yes vs. no)           | 1.75 (1.20 to 2.57) | 0.004   | 0.74(0.32 to 1.72)  | 0.5     |

\*Sex specific quartiles of factors, OR demonstrate comparison to lowest quartile (Q1)

\*\*BMI OR demonstrate comparison to participants in underweight/normal category

-Abbreviations: BMI: body mass index, BP: blood pressure, HDL: high density lipoprotein cholesterol.

-Conversion factors: HDL cholesterol mg/dL to mmol/L, x 0.02586; Triglycerides mg/dL to mmol/L, x 0.01129; Fasting glucose mg/dL to mmol/L, x 0.05551
